# Supplementary material for: Comprehensiveness of infant formula and bottle feeding resources: A review of information from Australian healthcare organisations
Source: PubMed Central journal article supplement — Matern Child Nutr. 2021 Dec 15;18(2):e13309. doi: 10.1111/mcn.13309 (PMC8932696; doi:10.1111/mcn.13309), 2021-12-15
Supplement: MCN-18-e13309-s007.pdf [file MCN-18-e13309-s007.pdf]

# Formula feeding resources

Record ID

---

Who is scoring this?

 Author/reviewer names  
   
   
   
   
   
   
 Consensus score

What is the name of this resource?

---

Who was the author or developer of this resource?

---

Which organisation developed this resource?

---

What type of resource is this?

- Handout  
 Brochure  
 Booklet  
 Video  
 Webpage  
 Other

If 'other', what type of resource is this?

---

When was this resource developed or last updated?

---

Who is the audience of this resource?

- Consumers  
 Health care professionals  
 Other professionals  
 (Consumers can include parents, carers or family members.)

If other, who is the audience for this resource?

---

Was this resource found by web search or hand search?

- Web search on Google search engine  
 Hand search

Provide the URL(s) of the resource here.

---

---

Briefly describe the formula feeding content of the resource.

---

---

What is the formula feeding topics covered in this resource?

- Composition of infant formula
- Discussion of infant formula with health workers
- Preparing infant formula - risks
- Preparing infant formula - preparing from powder and transporting
- Preparing infant formula - sterilising equipment
- Using infant formula - teats and flow rate
- Using infant formula - how to feed
- Using infant formula - how much to feed
- Using infant formula - using a feeding cup
- Special infant formula
- Fluoride in infant feeding

---

Provide any notes about this resource here.

---

---

Upload the resource analysed here, if available.

---

For resources with multiple parts (e.g. multiple webpages of a website), upload the resource analysed here.

---

For resources with multiple parts (e.g. multiple webpages of a website), upload the resource analysed here.

---

For resources with multiple parts (e.g. multiple webpages of a website), upload the resource analysed here.

---

For resources with multiple parts (e.g. multiple webpages of a website), upload the resource analysed here.

---

For resources with multiple parts (e.g. multiple webpages of a website), upload the resource analysed here.

---

For resources with multiple parts (e.g. multiple webpages of a website), upload the resource analysed here.

---

For resources with multiple parts (e.g. multiple webpages of a website), upload the resource analysed here.

---

For resources with multiple parts (e.g. multiple webpages of a website), upload the resource analysed here.

---

For resources with multiple parts (e.g. multiple webpages of a website), upload the resource analysed here.

---

Select a passage of text (where available) from this resource to analyse readability.

What is the Flesch-Kincaid reading grade level of this passage, calculated from an online calculator?

- 4th grade and below  
 5th grade  
 6th grade  
 7th grade  
 8th grade  
 9th grade and above

What is the SMOG reading grade level of this passage, calculated from an online calculator?

- 4th grade and below  
 5th grade  
 6th grade  
 7th grade  
 8th grade  
 9th grade and above

What is the Flesch-Kincaid reading grade level of this passage, calculated from Microsoft Office?

- 4th grade and below  
 5th grade  
 6th grade  
 7th grade  
 8th grade  
 9th grade and above

Code the resource for the following content.

### Infant Feeding Guidelines: 8.1 Composition of infant formula

**Note: if 'addressed incorrectly', make a note why or where.**

|                                                                                                                                           | +1, Addressed         | 0, Not addressed      | Not applicable/not the focus of the resource | -1, Addressed incorrectly |
|-------------------------------------------------------------------------------------------------------------------------------------------|-----------------------|-----------------------|----------------------------------------------|---------------------------|
| 8.1 - 'follow on' formula for infants 6-12 months is not necessary OR 'infant formula suitable from birth' can be used from 0-12 months   | <input type="radio"/> | <input type="radio"/> | <input type="radio"/>                        | <input type="radio"/>     |
| 8.1 - use a formula with lower protein level, as close as possible to human breast milk with 1-1.1g protein/100mL OR < 1.3g protein/100mL | <input type="radio"/> | <input type="radio"/> | <input type="radio"/>                        | <input type="radio"/>     |
| 8.1 - the resource explains difference between 'infant formula' (suitable from birth) and 'follow on formula' (from 6-12 months)          | <input type="radio"/> | <input type="radio"/> | <input type="radio"/>                        | <input type="radio"/>     |

CALCULATION: sum of 8.1 'Composition of infant formula content'

CALCULATION: sum of 8.1 'Composition of infant formula' possible points.

\_\_\_\_\_

CALCULATION: completeness of 8.1 'Composition of infant formula'.

\_\_\_\_\_

CALCULATION: number of sections in 8.1 coded as 'addressed'.

\_\_\_\_\_

CALCULATION: number of sections in 8.1 coded as 'not addressed'.

\_\_\_\_\_

CALCULATION: number of sections in 8.1 coded as 'addressed incorrectly'.

\_\_\_\_\_

### Infant feeding guidelines: 8.2 Health workers and infant formula

**Note: if 'addressed incorrectly', make a note why or where.**

|                                                                                                                                                                                | +1, Addressed         | 0, Not addressed      | Not applicable/not the focus of the resource | -1, Addressed incorrectly |
|--------------------------------------------------------------------------------------------------------------------------------------------------------------------------------|-----------------------|-----------------------|----------------------------------------------|---------------------------|
| 8.2 - a mother's informed decision not to breastfeed should be respected, education and support for formula feeding should be provided by health workers and other MDT members | <input type="radio"/> | <input type="radio"/> | <input type="radio"/>                        | <input type="radio"/>     |
| 8.2 - explanation of hazards of improper infant formula preparation (formula not prepared according to formula tin instructions)                                               | <input type="radio"/> | <input type="radio"/> | <input type="radio"/>                        | <input type="radio"/>     |
| 8.2 - explanation of hazards of improper infant formula storage                                                                                                                | <input type="radio"/> | <input type="radio"/> | <input type="radio"/>                        | <input type="radio"/>     |
| 8.2 - suitable infant formulas should be used until 12 months of age                                                                                                           | <input type="radio"/> | <input type="radio"/> | <input type="radio"/>                        | <input type="radio"/>     |
| 8.2 - financial cost of formula feeding                                                                                                                                        | <input type="radio"/> | <input type="radio"/> | <input type="radio"/>                        | <input type="radio"/>     |

CALCULATION: sum of 8.2 'Health workers and infant formula'

\_\_\_\_\_

CALCULATION: sum of 8.2 'Health workers and infant formula' possible points.

\_\_\_\_\_

CALCULATION: completeness of 8.2 'Health workers and infant formula'.

\_\_\_\_\_

CALCULATION: number of sections in 8.2 coded as 'addressed'. \_\_\_\_\_

CALCULATION: number of sections in 8.2 coded as 'not addressed'. \_\_\_\_\_

CALCULATION: number of sections in 8.2 coded as 'addressed incorrectly'. \_\_\_\_\_

### Infant feeding guidelines: 8.3 Preparing infant formula

**Note: if 'addressed incorrectly', make a note why or where.**

|                                                                                       | +1, Addressed         | 0, Not addressed      | Not applicable/not the focus of the resource | -1, Addressed incorrectly |
|---------------------------------------------------------------------------------------|-----------------------|-----------------------|----------------------------------------------|---------------------------|
| 8.3.1 - risk of bacterial contamination                                               | <input type="radio"/> | <input type="radio"/> | <input type="radio"/>                        | <input type="radio"/>     |
| 8.3.2 - wash hands [before preparing infant formula]                                  | <input type="radio"/> | <input type="radio"/> | <input type="radio"/>                        | <input type="radio"/>     |
| 8.3.2 - prepare formula in clean area                                                 | <input type="radio"/> | <input type="radio"/> | <input type="radio"/>                        | <input type="radio"/>     |
| 8.3.2 - wash equipment [before sterilising equipment]                                 | <input type="radio"/> | <input type="radio"/> | <input type="radio"/>                        | <input type="radio"/>     |
| 8.3.2 - sterilise equipment by boiling for 5 mins or using approved sterilising agent | <input type="radio"/> | <input type="radio"/> | <input type="radio"/>                        | <input type="radio"/>     |
| 8.3.2 - boil water and cool until lukewarm, to safe temperature (at least 30 minutes) | <input type="radio"/> | <input type="radio"/> | <input type="radio"/>                        | <input type="radio"/>     |
| 8.3.2 - follow instructions on tin for water/formula powder ratio                     | <input type="radio"/> | <input type="radio"/> | <input type="radio"/>                        | <input type="radio"/>     |
| 8.3.2 - add water to bottle first, then powder                                        | <input type="radio"/> | <input type="radio"/> | <input type="radio"/>                        | <input type="radio"/>     |
| 8.3.2 - pour correct amount of cooled water to bottle                                 | <input type="radio"/> | <input type="radio"/> | <input type="radio"/>                        | <input type="radio"/>     |
| 8.3.2 - always measure formula powder using scoop in can                              | <input type="radio"/> | <input type="radio"/> | <input type="radio"/>                        | <input type="radio"/>     |
| 8.3.2 - level off the scoop with levelling device or back of sterilised knife         | <input type="radio"/> | <input type="radio"/> | <input type="radio"/>                        | <input type="radio"/>     |
| 8.3.2 - lightly tap scoop to remove air bubbles                                       | <input type="radio"/> | <input type="radio"/> | <input type="radio"/>                        | <input type="radio"/>     |
| 8.3.2 - add correct number of scoops to bottle                                        | <input type="radio"/> | <input type="radio"/> | <input type="radio"/>                        | <input type="radio"/>     |

|                                                                                                                                                                        |                       |                       |                       |                       |
|------------------------------------------------------------------------------------------------------------------------------------------------------------------------|-----------------------|-----------------------|-----------------------|-----------------------|
| 8.3.2 - keep scoop in can when not in use                                                                                                                              | <input type="radio"/> | <input type="radio"/> | <input type="radio"/> | <input type="radio"/> |
| 8.3.2 - place teat and cap on bottle and shake until powder dissolves                                                                                                  | <input type="radio"/> | <input type="radio"/> | <input type="radio"/> | <input type="radio"/> |
| 8.3.2 - test formula temperature on wrist                                                                                                                              | <input type="radio"/> | <input type="radio"/> | <input type="radio"/> | <input type="radio"/> |
| Do not add cereal or any other foods to infant formula                                                                                                                 | <input type="radio"/> | <input type="radio"/> | <input type="radio"/> | <input type="radio"/> |
| 8.3.2 - discard unused formula after feeding                                                                                                                           | <input type="radio"/> | <input type="radio"/> | <input type="radio"/> | <input type="radio"/> |
| 8.3.2 - formula feeding should not take longer than 1hr                                                                                                                | <input type="radio"/> | <input type="radio"/> | <input type="radio"/> | <input type="radio"/> |
| 8.3.2 - discard formula kept at room temperature for >1hr                                                                                                              | <input type="radio"/> | <input type="radio"/> | <input type="radio"/> | <input type="radio"/> |
| 8.3.2 - store prepared formula that has not been kept at room temperature in fridge for up to 24hrs                                                                    | <input type="radio"/> | <input type="radio"/> | <input type="radio"/> | <input type="radio"/> |
| 8.3.2 - discard formula stored in fridge after 24hrs                                                                                                                   | <input type="radio"/> | <input type="radio"/> | <input type="radio"/> | <input type="radio"/> |
| 8.3.2 - ideally, prepare one bottle of formula at a time, just before feeding                                                                                          | <input type="radio"/> | <input type="radio"/> | <input type="radio"/> | <input type="radio"/> |
| 8.3.2 - do not use microwave to heat infant formula, due to risk of burns                                                                                              | <input type="radio"/> | <input type="radio"/> | <input type="radio"/> | <input type="radio"/> |
| 8.3.2 - preparation of feeds in advance: prepare sterilised bottles of water as required, refrigerate as required, warm by standing in warm water, then adding formula | <input type="radio"/> | <input type="radio"/> | <input type="radio"/> | <input type="radio"/> |
| 8.3.2 - preparation of feeds in advance: warm refrigerated infant formula by standing in warm water, before feeding infant                                             | <input type="radio"/> | <input type="radio"/> | <input type="radio"/> | <input type="radio"/> |
| 8.3.2 - transporting prepared feeds: cool infant formula to < 5C before transportation                                                                                 | <input type="radio"/> | <input type="radio"/> | <input type="radio"/> | <input type="radio"/> |
| 8.3.2 - transporting prepared feeds: transport in cool bag with ice packs                                                                                              | <input type="radio"/> | <input type="radio"/> | <input type="radio"/> | <input type="radio"/> |

|                                                                                                                                                           |                       |                       |                       |                       |
|-----------------------------------------------------------------------------------------------------------------------------------------------------------|-----------------------|-----------------------|-----------------------|-----------------------|
| 8.3.2 - transporting prepared feeds: use feeds transported in a cool bag within 2hrs                                                                      | <input type="radio"/> | <input type="radio"/> | <input type="radio"/> | <input type="radio"/> |
| 8.3.2 - transporting prepared feeds: rewarm at destination                                                                                                | <input type="radio"/> | <input type="radio"/> | <input type="radio"/> | <input type="radio"/> |
| 8.3.2 - transporting prepared feeds: if feed stored for < 2hrs until destination, it can be refrigerated for up to 24hrs from time of preparation         | <input type="radio"/> | <input type="radio"/> | <input type="radio"/> | <input type="radio"/> |
| 8.3.2 - transporting feeds: take separate sterilised bottles of cooled water at the correct formula and infant formula, to prepare formula at destination | <input type="radio"/> | <input type="radio"/> | <input type="radio"/> | <input type="radio"/> |
| 8.3.3 - boiling: wash bottles, teats, caps with brush before sterilisation                                                                                | <input type="radio"/> | <input type="radio"/> | <input type="radio"/> | <input type="radio"/> |
| 8.3.3 - boiling: place bottles, teats, caps in large saucepan                                                                                             | <input type="radio"/> | <input type="radio"/> | <input type="radio"/> | <input type="radio"/> |
| 8.3.3 - boiling: cover utensils in water                                                                                                                  | <input type="radio"/> | <input type="radio"/> | <input type="radio"/> | <input type="radio"/> |
| 8.3.3 - boiling: eliminate air bubbles from bottle                                                                                                        | <input type="radio"/> | <input type="radio"/> | <input type="radio"/> | <input type="radio"/> |
| 8.3.3 - boiling: boil for 5 mins                                                                                                                          | <input type="radio"/> | <input type="radio"/> | <input type="radio"/> | <input type="radio"/> |
| 8.3.3 - boiling: cool equipment in saucepan, then remove                                                                                                  | <input type="radio"/> | <input type="radio"/> | <input type="radio"/> | <input type="radio"/> |
| 8.3.3 - boiling: store equipment in clean container, in fridge                                                                                            | <input type="radio"/> | <input type="radio"/> | <input type="radio"/> | <input type="radio"/> |
| 8.3.3 - boiling: boil all equipment within 24hrs of use OR use all equipment within 24hrs of sterilisation                                                | <input type="radio"/> | <input type="radio"/> | <input type="radio"/> | <input type="radio"/> |
| 8.3.3 - chemical sterilisation: follow manufacturer instructions to prepare solution                                                                      | <input type="radio"/> | <input type="radio"/> | <input type="radio"/> | <input type="radio"/> |
| 8.3.3 - chemical sterilisation: discard solution after 24hrs                                                                                              | <input type="radio"/> | <input type="radio"/> | <input type="radio"/> | <input type="radio"/> |
| 8.3.3 - chemical sterilisation: only sterilise glass or plastic equipment, never metal                                                                    | <input type="radio"/> | <input type="radio"/> | <input type="radio"/> | <input type="radio"/> |
| 8.3.3 - chemical sterilisation: submerge equipment                                                                                                        | <input type="radio"/> | <input type="radio"/> | <input type="radio"/> | <input type="radio"/> |

|                                                                                                                                                                 |                       |                       |                       |                       |
|-----------------------------------------------------------------------------------------------------------------------------------------------------------------|-----------------------|-----------------------|-----------------------|-----------------------|
| 8.3.3 - chemical sterilisation:<br>eliminate air bubbles from bottle                                                                                            | <input type="radio"/> | <input type="radio"/> | <input type="radio"/> | <input type="radio"/> |
| 8.3.3 - chemical sterilisation:<br>leave equipment in sterilising<br>solution for recommended time                                                              | <input type="radio"/> | <input type="radio"/> | <input type="radio"/> | <input type="radio"/> |
| 8.3.3 - chemical sterilisation:<br>drain off equipment, do not rinse                                                                                            | <input type="radio"/> | <input type="radio"/> | <input type="radio"/> | <input type="radio"/> |
| 8.3.3 - steam sterilisation or<br>microwave steam sterilisation:<br>place cleaned equipment inside<br>unit, add water according to<br>manufacturer instructions | <input type="radio"/> | <input type="radio"/> | <input type="radio"/> | <input type="radio"/> |
| 8.3.3 - microwave steam<br>sterilisation: only sterilise glass<br>or plastic equipment, never<br>metal                                                          | <input type="radio"/> | <input type="radio"/> | <input type="radio"/> | <input type="radio"/> |

CALCULATION: sum of 8.3 'Preparing infant formula'

\_\_\_\_\_

CALCULATION: sum of 8.3 'Preparing infant formula'  
possible points.

\_\_\_\_\_

CALCULATION: completeness of 8.3 'Preparing infant  
formula' possible points.

\_\_\_\_\_

CALCULATION: number of sections in 8.3 coded as  
'addressed'.

\_\_\_\_\_

CALCULATION: number of sections in 8.3 coded as 'not  
addressed'.

\_\_\_\_\_

CALCULATION: number of sections in 8.3 coded as  
'addressed incorrectly'.

\_\_\_\_\_

**Infant Feeding Guidelines: 8.4 Using infant formula**

**Note: if 'addressed incorrectly', make a note why or where.**

|                                                                                      | +1, Addressed         | 0, Not addressed      | Not applicable/not the<br>focus of the resource | -1, Addressed<br>incorrectly |
|--------------------------------------------------------------------------------------|-----------------------|-----------------------|-------------------------------------------------|------------------------------|
| 8.4.1 - milk should drip steadily<br>from a teat, without pouring out<br>in a stream | <input type="radio"/> | <input type="radio"/> | <input type="radio"/>                           | <input type="radio"/>        |



|                                                                                                                                                                                                                                                                                                                                                                                                                     |                       |                       |                       |                       |
|---------------------------------------------------------------------------------------------------------------------------------------------------------------------------------------------------------------------------------------------------------------------------------------------------------------------------------------------------------------------------------------------------------------------|-----------------------|-----------------------|-----------------------|-----------------------|
| 8.4.1 - faster teat preferable to slower teat (infant may sleep before adequately fullness)                                                                                                                                                                                                                                                                                                                         | <input type="radio"/> | <input type="radio"/> | <input type="radio"/> | <input type="radio"/> |
| 8.4.1 - check and replace teats regularly, silicone and rubber teats may crack and harbour bacteria, or become ingested                                                                                                                                                                                                                                                                                             | <input type="radio"/> | <input type="radio"/> | <input type="radio"/> | <input type="radio"/> |
| 3.3.1 - do not dip bottle teats in sugar, jam, honey or other sugary substances                                                                                                                                                                                                                                                                                                                                     | <input type="radio"/> | <input type="radio"/> | <input type="radio"/> | <input type="radio"/> |
| Hold your baby close in a semi-upright position, with their head supported in a comfortable position so they can breathe and swallow comfortably.                                                                                                                                                                                                                                                                   | <input type="radio"/> | <input type="radio"/> | <input type="radio"/> | <input type="radio"/> |
| 8.4.2 - holding, cuddling and talking to infant during feeding for parent-infant contact. Look into your baby's eyes and talk to them when feeding.                                                                                                                                                                                                                                                                 | <input type="radio"/> | <input type="radio"/> | <input type="radio"/> | <input type="radio"/> |
| Brush the teat against the baby's lips. When they open their mouth wide, allow them to draw the teat in.                                                                                                                                                                                                                                                                                                            | <input type="radio"/> | <input type="radio"/> | <input type="radio"/> | <input type="radio"/> |
| Make sure there's no air in the bottle teat when feeding. To ensure the baby is taking in milk and not air, you should see bubbles in the bottle as your baby feeds. If you don't see bubbles, your baby may have created a vacuum in the teat and no milk will be flowing. Break the vacuum by moving the teat slightly to the side of your baby's mouth, or by pulling gently on the corner of your baby's mouth. | <input type="radio"/> | <input type="radio"/> | <input type="radio"/> | <input type="radio"/> |
| You should see bubbles rushing back up into the remaining milk.                                                                                                                                                                                                                                                                                                                                                     |                       |                       |                       |                       |

Babies feed in bursts of sucking, with short pauses to rest. When they pause during feeding, gently remove the teat or bring the bottle downwards to cut off the flow of milk: this mimics the stop-start motion of breastfeeding. Allow them to have a short rest before they start to suck again.

Watch your baby for cues for when they need a break. This will be different from baby to baby. They may splay their fingers and toes, spill milk out of their mouths, stop sucking, turn their head away, or push the bottle away. They may also need to burp sometimes. (At least one cue signalling when infants need a break must be addressed.)

8.4.3 - bottle feed according to infant appetite and need. (Your baby may need to stop if they: splay their fingers and toes, spill milk out of their mouths, stop sucking, turn their head away, or push the bottle away.) Your baby will know how much milk they need. Do not force your baby to finish a feed or to drink more they want - this can be distressing, and you could overfeed your baby.

8.4.2 - do not leave infant to feed unattended with propped bottle

8.4.2 - do not put infant to sleep while drinking from bottle

8.4.2 - infant sleeping during bottle feeding OR prop feeding increases risk of choking, ear infections and dental caries

|                                                                                                                                                             |                       |                       |                       |                       |
|-------------------------------------------------------------------------------------------------------------------------------------------------------------|-----------------------|-----------------------|-----------------------|-----------------------|
| 8.4.3 - healthy infant growth with >6 wet nappies daily, consistent weight gain and thriving active infant.<br>(At least 2 of 3 factors must be addressed.) | <input type="radio"/> | <input type="radio"/> | <input type="radio"/> | <input type="radio"/> |
| 8.4.3 - approximate formula requirements - 30-60mL/kg/day, increasing over next few days, from days 1-4                                                     | <input type="radio"/> | <input type="radio"/> | <input type="radio"/> | <input type="radio"/> |
| 8.4.3 - approximate formula requirements - 150mL/kg/day, from day 5 to 3 months                                                                             | <input type="radio"/> | <input type="radio"/> | <input type="radio"/> | <input type="radio"/> |
| 8.4.3 - approximate formula requirements - 120mL/kg/day, from 3 to 6 months                                                                                 | <input type="radio"/> | <input type="radio"/> | <input type="radio"/> | <input type="radio"/> |
| 8.4.3 - approximate formula requirements - 90-100mL/kg/day, from 6 to 12 months                                                                             | <input type="radio"/> | <input type="radio"/> | <input type="radio"/> | <input type="radio"/> |
| 8.4.3 - information on formula packages recommending certain amounts for various ages is a guide only and does not necessarily suit every infant            | <input type="radio"/> | <input type="radio"/> | <input type="radio"/> | <input type="radio"/> |
| 8.4.3 - constipation may occur after introduction of formula                                                                                                | <input type="radio"/> | <input type="radio"/> | <input type="radio"/> | <input type="radio"/> |
| 8.4.4 - feeding cup may be used for bottle weaning for infants over 6 months of age                                                                         | <input type="radio"/> | <input type="radio"/> | <input type="radio"/> | <input type="radio"/> |
| 8.4.4 - sterilise feeding cups for up to 12 months of age                                                                                                   | <input type="radio"/> | <input type="radio"/> | <input type="radio"/> | <input type="radio"/> |

---

CALCULATION: sum of 8.4 'Using infant formula'

---



---

CALCULATION: sum of 8.4 'Using infant formula' possible points.

---



---

CALCULATION: completeness of 8.4 'Using infant formula' possible points.

---



---

CALCULATION: number of sections in 8.4 coded as 'addressed'.

---



---

CALCULATION: number of sections in 8.4 coded as 'not addressed'.

---



---

CALCULATION: number of sections in 8.4 coded as 'addressed incorrectly'.

---

## Infant Feeding Guidelines: 8.5 Special infant formulas

**Note: if 'addressed incorrectly', make a note why or where.**

|                                                                                                                                                            | +1, Addressed         | 0, Not addressed      | Not applicable/not the focus of the resource | -1, Addressed incorrectly |
|------------------------------------------------------------------------------------------------------------------------------------------------------------|-----------------------|-----------------------|----------------------------------------------|---------------------------|
| 8.5 - use cow's milk-based formulas until 12 months of age                                                                                                 | <input type="radio"/> | <input type="radio"/> | <input type="radio"/>                        | <input type="radio"/>     |
| 8.5 - special formula should be used for medical conditions, on the advice of a paediatrician                                                              | <input type="radio"/> | <input type="radio"/> | <input type="radio"/>                        | <input type="radio"/>     |
| 8.5 - special formulas may be used under medical supervision for infants who cannot take cow's milk-based products for other cultural or religious reasons | <input type="radio"/> | <input type="radio"/> | <input type="radio"/>                        | <input type="radio"/>     |
| 8.5.1 - hydrolysed formula: does not prevent development of allergic disease, asthma, eczema or allergic rhinitis                                          | <input type="radio"/> | <input type="radio"/> | <input type="radio"/>                        | <input type="radio"/>     |
| 8.5.1 - hydrolysed formula: extensively hydrolysed infant formula for use for infants with proven's cow's milk allergy or cow's milk protein intolerance   | <input type="radio"/> | <input type="radio"/> | <input type="radio"/>                        | <input type="radio"/>     |
| 8.5.1 - soy formula: not for use with preterm infants                                                                                                      | <input type="radio"/> | <input type="radio"/> | <input type="radio"/>                        | <input type="radio"/>     |
| 8.5.1 - soy formula: does not prevent development of allergic disease                                                                                      | <input type="radio"/> | <input type="radio"/> | <input type="radio"/>                        | <input type="radio"/>     |
| 8.5.1 - goat's milk formula: does not prevent development of allergic disease                                                                              | <input type="radio"/> | <input type="radio"/> | <input type="radio"/>                        | <input type="radio"/>     |
| 8.5.1 - prebiotics/probiotics in formula: insufficient evidence to recommend its use                                                                       | <input type="radio"/> | <input type="radio"/> | <input type="radio"/>                        | <input type="radio"/>     |

CALCULATION: sum of 8.5 'Special infant formulas'

\_\_\_\_\_

CALCULATION: sum of 8.5 'Special infant formulas' possible points.

\_\_\_\_\_

CALCULATION: completeness of 8.5 'Special infant formulas' possible points.

\_\_\_\_\_

CALCULATION: number of sections in 8.5 coded as 'addressed'.

\_\_\_\_\_

CALCULATION: number of sections in 8.5 coded as 'not addressed'.

---

CALCULATION: number of sections in 8.5 coded as 'addressed incorrectly'.

---

### Infant Feeding Guidelines: 8.6 Fluoride in infant feeding

**Note: if 'addressed incorrectly', make a note why or where.**

|                                                                                                         | +1, Addressed         | 0, Not addressed      | Not applicable/not the focus of the resource | -1, Addressed incorrectly |
|---------------------------------------------------------------------------------------------------------|-----------------------|-----------------------|----------------------------------------------|---------------------------|
| 8.6 - fluoride supplement not recommended                                                               | <input type="radio"/> | <input type="radio"/> | <input type="radio"/>                        | <input type="radio"/>     |
| 8.6 - for infants 6-24 months living in areas with unfluoridated water supply, seek advice from dentist | <input type="radio"/> | <input type="radio"/> | <input type="radio"/>                        | <input type="radio"/>     |

CALCULATION: sum of 8.6 'Fluoride in infant feeding'

---

CALCULATION: sum of 8.6 'Fluoride in infant feeding' possible points.

---

CALCULATION: completeness of 8.6 'Fluoride in infant feeding' possible points.

---

CALCULATION: number of sections in 8.6 coded as 'addressed'.

---

CALCULATION: number of sections in 8.6 coded as 'not addressed'.

---

CALCULATION: number of sections in 8.6 coded as 'addressed incorrectly'.

---

OVERALL calculated sum of all points:

---

OVERALL calculated sum of all possible points:

---

Completeness of resource (%):

---

Upload a coded copy of your resource here.

---

For resources with multiple parts (e.g. multiple webpages of a website), upload the coded copy of your resource here.

---

For resources with multiple parts (e.g. multiple webpages of a website), upload the coded copy of your resource here.

---

For resources with multiple parts (e.g. multiple webpages of a website), upload the coded copy of your resource here.

---

For resources with multiple parts (e.g. multiple webpages of a website), upload the coded copy of your resource here.

---

For resources with multiple parts (e.g. multiple webpages of a website), upload the coded copy of your resource here.

---

For resources with multiple parts (e.g. multiple webpages of a website), upload the coded copy of your resource here.

---

For resources with multiple parts (e.g. multiple webpages of a website), upload the coded copy of your resource here.

---

For resources with multiple parts (e.g. multiple webpages of a website), upload the coded copy of your resource here.

---

For resources with multiple parts (e.g. multiple webpages of a website), upload the coded copy of your resource here.
